# Supplementary material for: Molecular Profiling of Inflammatory Mediators in Human Respiratory Syncytial Virus and Human Bocavirus Infection
Source: MDPI journal article supplement (doi:10.3390/genes14051101), 2023-05-17
Supplement: s1 [file s1]

**Table S1.** Primers for cytokines and chemokines detection.

| Primer name      | Primer sequence                     | Reference |
|------------------|-------------------------------------|-----------|
| IFN- $\gamma$ -F | 5'-TGACCAGAGCATCCAAAAGA -3'         | [35]      |
| IFN- $\gamma$ -R | 5'-CTCTTCGACCTCGAAACAGC-3'          |           |
| TNF- $\alpha$ -F | 5'-CCGAGGCAGTCAGATCATCTT-3'         | [36]      |
| TNF- $\alpha$ -R | 5'-GCTGCCCCCTCAGCTTGA-3'            |           |
| IL-1 $\beta$ -F  | 5'-GGAGCAACAAGTGGTGTCT-3'           | [38]      |
| IL-1 $\beta$ -R  | 5'-AAAGTCCAGGCTATAGCCGT-3'          |           |
| IL 4-F           | 5'- AACGGCTCGACAGGAACCT-3'          | [37]      |
| IL 4-R           | 5'- ACTCTGGTTGGCTTCCTTCCA-3'        |           |
| IL 6-F           | 5'- ATGTAGCCGCCCCACACAGA-3'         | [39]      |
| IL 6-R           | 5'- CATCCATCTTTTTCAGCCAT-3'         |           |
| IL 10-F          | 5'- TGGGGGAGACCTGAAGAC-3'           | [40]      |
| IL 10-R          | 5'- ACAGGGAAGAAATCGATGACA-3'        |           |
| IL 13-F          | 5'- GGAGCTGGTCAACATCACCC-3'         | [41]      |
| IL 13-R          | 5'- CGTTGATCAGGGATTCCAGG-3'         |           |
| IL 8-F           | 5'- GAGTGATTGAGAGTGGACCACACT-3'     | [42]      |
| IL 8-R           | 5'- GCTCTCTTCCATCAGAAAGCTTTAC-3'    |           |
| IL 31-F          | 5'- ATGATGTACAGAAAATAGTCGAGGAATT-3' | [40]      |
| IL 31-R          | 5'- CTTCTCTTCTCCACATCTTTCAAA-3'     |           |
| IL 33-F          | 5'- TGAGACTCCGTTCTGGCCTC-3'         | [39]      |
| IL 33-R          | 5'- CTCTTCATGCTTGGTACCCGAT-3'       |           |
| IL 17-F          | CATCCATAACCGGAATACCAATA-3'          | [43]      |
| IL 17-R          | 5'- TAGTCCACGTTCCCATCAGC-3'         |           |
| IL 18-F          | 5'- GCTTGAATCTAAATTATCAGTC-3'       | [44]      |
| IL 18-R          | 5'- GAAGATTCAAATTGCATCTTAT-3'       |           |
| IL 22-F          | 5'- GCTTGACAAGTCCAACCTTCCA-3'       | [45]      |
| IL 22-R          | 5'- GCTCACTCATACTGACTCCGTG-3'       |           |
| IL-1 $\alpha$ -F | 5'- ATCAGTACCTCACGGCTGCT-3'         | [44]      |
| IL-1 $\alpha$ -R | 5'- TGGGTATCTCAGGCATCTCC-3'         |           |
| G-CSF-F          | 5'- AGAGAGTGTCCGAGCAGCAC-3'         | [46]      |
| G-CSF-R          | 5'- CAAGTGAGGAAGATCCAGGG-3'         |           |
| CCL2-F           | 5'- AGGTGACTGGGGCATTGAT-3'          | [39]      |
| CCL2-R           | 5'- GCCTCCAGCATGAAAGTCTC-3'         |           |
| CCL3-F           | 5'- CAT CAC TTG CTG CTG ACA CG-3'   | [39]      |
| CCL3-R           | 5'- TGT GGA ATC TGC CGG GAG-3'      |           |
| CCL4-F           | 5'- CTTCTCTCTCCTCCTGCTTGT-3'        | [47]      |
| CCL4-R           | 5'- GCAAAGGCTGCTGGTCTC-3'           |           |
| CCL5-F           | 5'- CCATGAAGGTCTCCGCGGCAC-3'        | [48]      |
| CCL5-R           | 5'- CCTAGCTCATCTCCAAAGAG-3'         |           |
| GM-CSF-F         | 5'- CACTGCTGCTGAGATGAATGAAA-3'      | [49]      |
| GM-CSF-R         | 5'- GTCTGTAGGCAGGTCGGCTC-3'         |           |
